# Supplementary material for: Variations of Major Glucosinolates in Diverse Chinese Cabbage (Brassica rapa ssp. pekinensis) Germplasm as Analyzed by UPLC-ESI-MS/MS
Source: MDPI journal article supplement (doi:10.3390/ijms25094829), 2024-04-29
Supplement: s1 [file s1]

# Variations in Major Glucosinolates in Diverse Chinese Cabbage (*Brassica rapa* ssp. *pekinensis*) Germplasm as Analyzed by UPLC-ESI-MS/MS

Seong-Hoon Kim<sup>1,\*</sup>, Kingsley Ochar<sup>1,†</sup>, Kanivalan Iwar<sup>1</sup>, Yoon-Jung Lee<sup>1</sup>, HaeJuKang<sup>2</sup> and Young-Wang Na<sup>1</sup>

<sup>1</sup> National Institute of Agrobiodiversity Center, National Institute of Agricultural Sciences, Rural Development Administration, Jeonju 5487, Republic of Korea; ocharking@korea.kr (K.O.); kani05@korea.kr (K.I.); yoon112@korea.kr (Y.-J.L.); ywna@korea.kr (Y.-W.N.)

<sup>2</sup> Department of Agrofood Resource, National Institute of Agricultural Sciences, Rural Development Administration, Jeonju 5487, Republic of Korea

\* Correspondence: shkim0819@korea.kr

Table S1. Glucosinolates content in the 134 Chinese cabbage accessions

| S/N | IT Number | Accession type | Origin      | Sinigrin (mol/kg DW) | Gluconapin (mol/kg DW) | Glucobrassicinapin (mol/kg DW) | Epiprogoitrin (mol/kg DW) | Progoitrin (mol/kg DW) | Glucotropaeolin (mol/kg DW) | Glucoraphasatin (mol/kg DW) |
|-----|-----------|----------------|-------------|----------------------|------------------------|--------------------------------|---------------------------|------------------------|-----------------------------|-----------------------------|
| 1   | 100402    | landrace       | Taiwan      | 3.11                 | 1830.69                | 1458.34                        | 98.65                     | 112.27                 | 0.69                        | 0.00                        |
| 2   | 100405    | landrace       | Taiwan      | 4.05                 | 1729.04                | 143.27                         | 38.32                     | 43.12                  | 1.55                        | 0.00                        |
| 3   | 100417    | landrace       | Taiwan      | 5.76                 | 2288.13                | 1837.84                        | 1563.41                   | 1470.32                | 0.36                        | 0.16                        |
| 4   | 100422    | landrace       | Taiwan      | 3.13                 | 522.46                 | 737.67                         | 591.21                    | 632.22                 | 1.05                        | 0.14                        |
| 5   | 100437    | landrace       | Taiwan      | 6.98                 | 3503.90                | 1385.26                        | 84.15                     | 90.75                  | 0.75                        | 0.00                        |
| 6   | 100439    | landrace       | Taiwan      | 3.13                 | 1664.53                | 2586.18                        | 963.10                    | 949.39                 | 2.47                        | 0.11                        |
| 7   | 100451    | landrace       | Taiwan      | 2.83                 | 2195.50                | 3494.91                        | 414.18                    | 429.28                 | 2.62                        | 0.03                        |
| 8   | 102914    | landrace       | China       | 2.24                 | 582.11                 | 1142.26                        | 156.47                    | 183.48                 | 0.97                        | 0.11                        |
| 9   | 112275    | landrace       | Japan       | 1.89                 | 851.24                 | 782.28                         | 302.81                    | 321.30                 | 1.23                        | 0.00                        |
| 10  | 112664    | landrace       | China       | 4.13                 | 2100.08                | 3254.08                        | 1460.74                   | 1317.22                | 2.61                        | 0.25                        |
| 11  | 112665    | landrace       | Japan       | 0.57                 | 54.10                  | 148.30                         | 199.34                    | 221.02                 | 1.22                        | 0.11                        |
| 12  | 112667    | landrace       | Japan       | 2.22                 | 92.80                  | 704.52                         | 342.64                    | 395.40                 | 0.76                        | 0.00                        |
| 13  | 112821    | landrace       | South Korea | 1.22                 | 152.70                 | 1039.51                        | 324.88                    | 357.12                 | 2.77                        | 0.11                        |

|    |        |          |               |       |         |         |         |         |      |      |
|----|--------|----------|---------------|-------|---------|---------|---------|---------|------|------|
| 14 | 113557 | landrace | South Korea   | 1.04  | 266.85  | 1945.72 | 418.74  | 464.46  | 1.73 | 0.42 |
| 15 | 120022 | landrace | Netherland    | 4.11  | 332.80  | 1223.24 | 344.07  | 376.63  | 1.12 | 0.00 |
| 16 | 120030 | landrace | United States | 1.63  | 75.64   | 291.83  | 257.34  | 287.99  | 1.00 | 0.12 |
| 17 | 120034 | landrace | Hong Kong     | 1.16  | 426.76  | 946.69  | 74.17   | 87.29   | 0.78 | 0.15 |
| 18 | 120036 | landrace | Hong Kong     | 7.11  | 1213.77 | 2366.53 | 230.63  | 563.58  | 0.49 | 0.14 |
| 19 | 120040 | landrace | Hong Kong     | 4.84  | 1934.50 | 2278.64 | 1194.13 | 1175.64 | 0.39 | 0.12 |
| 20 | 120042 | landrace | HongKong      | 13.18 | 1957.43 | 1881.28 | 399.20  | 890.54  | 0.53 | 0.13 |
| 21 | 120043 | landrace | Taiwan        | 4.68  | 1121.94 | 2157.42 | 502.31  | 551.57  | 0.18 | 0.00 |
| 22 | 120044 | landrace | Taiwan        | 13.00 | 5060.19 | 5987.36 | 1400.90 | 1368.44 | 0.74 | 0.18 |
| 23 | 120090 | landrace | Hongkong      | 3.09  | 1073.33 | 294.07  | 575.89  | 632.00  | 2.08 | 0.00 |
| 24 | 141425 | landrace | South Korea   | 1.81  | 109.61  | 1514.53 | 192.41  | 211.50  | 3.66 | 0.16 |
| 25 | 160325 | landrace | China         | 9.15  | 7397.62 | 3434.83 | 194.51  | 206.53  | 1.23 | 0.66 |
| 26 | 166986 | landrace | China         | 4.59  | 2703.40 | 1694.36 | 497.96  | 498.18  | 0.80 | 1.07 |
| 27 | 186727 | landrace | Japan         | 2.66  | 893.80  | 3137.97 | 287.86  | 313.33  | 2.53 | 0.15 |
| 28 | 186728 | landrace | Japan         | 9.63  | 5737.45 | 296.69  | 2412.79 | 1986.40 | 1.59 | 0.67 |
| 29 | 186729 | landrace | Japan         | 1.73  | 600.51  | 905.58  | 437.44  | 459.56  | 1.29 | 0.00 |
| 30 | 199696 | landrace | Japan         | 1.95  | 1311.10 | 2066.71 | 300.77  | 333.94  | 1.20 | 0.00 |
| 31 | 199704 | landrace | Australia     | 11.55 | 445.13  | 1800.84 | 619.66  | 716.01  | 1.15 | 0.00 |
| 32 | 199710 | landrace | China         | 5.08  | 3826.10 | 3636.10 | 124.81  | 154.53  | 0.32 | 0.27 |
| 33 | 203324 | landrace | Russia        | 1.52  | 146.30  | 1572.34 | 136.67  | 181.41  | 2.06 | 0.27 |
| 34 | 208851 | landrace | South Korea   | 5.02  | 848.81  | 3000.19 | 414.42  | 461.60  | 1.31 | 0.20 |
| 35 | 212912 | landrace | South Korea   | 0.88  | 124.46  | 409.01  | 220.80  | 263.00  | 0.48 | 0.00 |
| 36 | 214688 | landrace | Korea         | 0.76  | 110.50  | 169.94  | 48.41   | 60.60   | 0.75 | 0.00 |
| 37 | 214998 | landrace | South Korea   | 1.58  | 360.76  | 1369.22 | 43.92   | 55.14   | 1.04 | 0.14 |
| 38 | 214999 | landrace | South Korea   | 7.30  | 720.23  | 2628.78 | 277.73  | 356.37  | 2.22 | 0.00 |
| 39 | 215000 | landrace | South Korea   | 3.65  | 448.31  | 794.76  | 300.43  | 355.34  | 2.65 | 0.52 |

|    |        |          |             |       |         |         |         |         |      |      |
|----|--------|----------|-------------|-------|---------|---------|---------|---------|------|------|
| 40 | 215001 | landrace | South Korea | 4.22  | 2521.17 | 4658.49 | 198.95  | 237.56  | 1.03 | 0.58 |
| 41 | 215002 | landrace | South Korea | 3.05  | 218.67  | 201.07  | 81.55   | 100.84  | 0.73 | 0.25 |
| 42 | 215006 | landrace | South Korea | 2.11  | 596.41  | 1681.38 | 40.76   | 54.08   | 3.61 | 0.00 |
| 43 | 219621 | landrace | Brazil      | 5.34  | 5283.50 | 2682.34 | 739.71  | 879.59  | 0.63 | 1.27 |
| 44 | 221729 | landrace | China       | 3.21  | 108.48  | 1020.64 | 372.10  | 420.17  | 0.55 | 0.00 |
| 45 | 221731 | landrace | China       | 1.44  | 148.49  | 1696.89 | 355.52  | 436.99  | 2.32 | 0.00 |
| 46 | 221732 | landrace | China       | 1.86  | 685.31  | 655.99  | 135.30  | 192.51  | 0.53 | 0.00 |
| 47 | 221733 | landrace | China       | 1.22  | 24.94   | 13.43   | 14.58   | 18.06   | 0.71 | 0.20 |
| 48 | 221734 | landrace | China       | 8.68  | 751.90  | 3307.32 | 220.63  | 260.68  | 1.81 | 0.36 |
| 49 | 221735 | landrace | China       | 4.29  | 1414.12 | 2752.73 | 1318.60 | 1410.10 | 2.79 | 0.00 |
| 50 | 221737 | landrace | China       | 1.36  | 98.40   | 694.63  | 645.60  | 720.01  | 1.04 | 0.16 |
| 51 | 221738 | landrace | China       | 2.17  | 1346.03 | 1744.22 | 280.22  | 332.15  | 2.99 | 0.42 |
| 52 | 221739 | landrace | China       | 2.42  | 1193.45 | 2070.63 | 704.74  | 815.52  | 1.26 | 0.31 |
| 53 | 221741 | landrace | China       | 3.54  | 490.67  | 1163.74 | 143.66  | 167.91  | 1.63 | 0.17 |
| 54 | 221742 | landrace | China       | 2.30  | 772.02  | 361.62  | 861.83  | 929.87  | 0.77 | 0.00 |
| 55 | 221746 | landrace | China       | 2.43  | 491.10  | 1251.67 | 454.11  | 521.13  | 0.54 | 0.00 |
| 56 | 221751 | landrace | Japan       | 10.25 | 4717.65 | 1875.72 | 66.26   | 81.32   | 0.41 | 0.64 |
| 57 | 221752 | landrace | Japan       | 2.09  | 2150.12 | 1007.65 | 809.95  | 883.32  | 1.24 | 0.57 |
| 58 | 221754 | landrace | Japan       | 14.27 | 5670.40 | 6460.73 | 667.63  | 750.81  | 1.17 | 1.65 |
| 59 | 221755 | landrace | Japan       | 4.33  | 4272.20 | 3089.45 | 242.20  | 286.34  | 0.98 | 0.67 |
| 60 | 221760 | Cultivar | Taiwan      | 7.97  | 577.35  | 2060.57 | 895.64  | 997.56  | 1.48 | 0.00 |
| 61 | 221787 | landrace | Japan       | 1.71  | 779.02  | 1678.46 | 465.44  | 550.45  | 4.91 | 0.26 |
| 62 | 221789 | landrace | Japan       | 23.23 | 7019.61 | 4952.22 | 1423.82 | 1476.41 | 3.01 | 2.78 |
| 63 | 227012 | landrace | South Korea | 4.78  | 2652.18 | 4114.99 | 974.49  | 1065.69 | 1.45 | 2.55 |
| 64 | 227013 | landrace | South Korea | 1.81  | 1609.67 | 1202.90 | 115.53  | 134.82  | 1.94 | 0.48 |
| 65 | 227906 | landrace | Uzbekistan  | 17.53 | 2887.56 | 5926.41 | 466.43  | 567.12  | 1.23 | 0.94 |

|    |        |          |             |       |         |         |         |         |      |      |
|----|--------|----------|-------------|-------|---------|---------|---------|---------|------|------|
| 66 | 228181 | landrace | Japan       | 0.90  | 330.62  | 1040.66 | 28.22   | 35.19   | 4.42 | 0.04 |
| 67 | 228195 | landrace | Peru        | 6.08  | 163.42  | 1788.07 | 610.28  | 669.79  | 3.28 | 0.00 |
| 68 | 228854 | landrace | Uzbekistan  | 1.73  | 694.30  | 2460.65 | 436.44  | 488.54  | 3.70 | 1.12 |
| 69 | 235343 | landrace | South Korea | 1.16  | 222.97  | 1580.19 | 576.58  | 661.48  | 2.02 | 0.94 |
| 70 | 235413 | landrace | Germany     | 1.68  | 436.25  | 2131.46 | 382.35  | 438.73  | 2.07 | 0.23 |
| 71 | 235966 | landrace | Kyrgyzstan  | 4.26  | 1175.26 | 2760.80 | 1659.00 | 1487.13 | 1.22 | 0.73 |
| 72 | 247931 | landrace | China       | 1.45  | 591.57  | 734.87  | 293.29  | 338.82  | 0.90 | 0.28 |
| 73 | 247932 | Cultivar | China       | 5.25  | 2232.25 | 1471.79 | 894.87  | 934.45  | 1.21 | 0.08 |
| 74 | 247938 | Cultivar | China       | 1.58  | 141.24  | 652.79  | 347.17  | 403.46  | 0.73 | 0.14 |
| 75 | 247960 | landrace | China       | 1.07  | 279.20  | 982.05  | 534.39  | 585.18  | 2.03 | 0.37 |
| 76 | 247966 | Cultivar | China       | 1.60  | 305.52  | 661.14  | 778.25  | 905.86  | 2.96 | 0.00 |
| 77 | 247979 | Cultivar | China       | 2.00  | 950.85  | 1662.55 | 215.19  | 241.33  | 2.72 | 0.39 |
| 78 | 248400 | Cultivar | Japan       | 14.08 | 4671.61 | 1453.30 | 1575.37 | 1527.50 | 1.72 | 1.18 |
| 79 | 248599 | landrace | South Korea | 3.26  | 1920.50 | 2946.81 | 392.84  | 412.89  | 3.26 | 0.15 |
| 80 | 251123 | Cultivar | China       | 3.66  | 2785.41 | 2612.41 | 323.50  | 375.51  | 3.49 | 0.00 |
| 81 | 260815 | Cultivar | China       | 10.66 | 3917.14 | 4619.06 | 374.02  | 414.86  | 0.69 | 0.45 |
| 82 | 278620 | landrace | Myanmar     | 3.01  | 1908.45 | 1117.54 | 2107.32 | 2026.53 | 0.28 | 0.44 |
| 83 | 278640 | landrace | South Korea | 1.84  | 692.90  | 1474.02 | 228.52  | 260.34  | 1.35 | 0.00 |
| 84 | 278703 | landrace | South Korea | 0.34  | 142.27  | 204.60  | 116.09  | 136.84  | 1.64 | 0.00 |
| 85 | 293003 | landrace | Mongolia    | 2.64  | 991.90  | 1002.55 | 602.45  | 693.08  | 1.92 | 0.48 |
| 86 | 293004 | landrace | Mongolia    | 2.53  | 1749.07 | 2141.87 | 527.57  | 543.52  | 1.02 | 0.31 |
| 87 | 293076 | landrace | Austria     | 0.61  | 534.81  | 861.35  | 103.34  | 119.88  | 1.54 | 0.00 |
| 88 | 321040 | landrace | South Korea | 1.52  | 573.86  | 952.35  | 155.67  | 177.43  | 0.40 | 0.20 |
| 89 | 321041 | landrace | South Korea | 0.48  | 41.00   | 232.94  | 63.67   | 73.34   | 1.44 | 0.13 |
| 90 | 327479 | Cultivar | China       | 3.95  | 404.14  | 2116.94 | 361.63  | 391.85  | 0.87 | 0.15 |
| 91 | 336315 | landrace | South Korea | 0.48  | 43.09   | 145.57  | 162.15  | 182.56  | 1.45 | 0.40 |

|     |        |          |                |      |         |         |         |         |      |      |
|-----|--------|----------|----------------|------|---------|---------|---------|---------|------|------|
| 92  | 339601 | Cultivar | South Korea    | 2.12 | 1642.25 | 1847.31 | 655.74  | 696.02  | 1.09 | 0.41 |
| 93  | 339602 | landrace | South Korea    | 0.51 | 132.01  | 194.86  | 324.60  | 366.50  | 0.39 | 0.19 |
| 94  | 344732 | landrace | Malaysia       | 1.44 | 1761.53 | 494.63  | 33.47   | 41.75   | 0.33 | 0.21 |
| 95  | 344733 | landrace | Japan          | 0.27 | 459.26  | 412.52  | 95.35   | 108.14  | 1.16 | 0.14 |
| 96  | 344734 | landrace | Japan          | 2.85 | 318.83  | 1418.15 | 365.23  | 411.87  | 0.52 | 0.26 |
| 97  | 344735 | landrace | Newzealand     | 5.02 | 308.10  | 893.59  | 645.47  | 680.12  | 0.93 | 0.13 |
| 98  | 344736 | landrace | Austria        | 1.76 | 89.82   | 584.95  | 249.78  | 280.11  | 3.65 | 0.15 |
| 99  | 344737 | landrace | Austria        | 1.68 | 435.57  | 1255.26 | 784.48  | 789.85  | 0.61 | 0.32 |
| 100 | 344740 | landrace | France         | 2.82 | 970.35  | 1247.29 | 340.30  | 391.23  | 4.55 | 0.44 |
| 101 | 344741 | landrace | Netherland     | 0.69 | 143.83  | 514.67  | 149.53  | 165.19  | 1.99 | 0.00 |
| 102 | 344742 | landrace | United Kingdom | 1.76 | 886.31  | 1268.27 | 1052.70 | 1064.81 | 0.96 | 0.00 |
| 103 | 344743 | Cultivar | Russia         | 2.62 | 2138.87 | 3217.83 | 252.84  | 288.51  | 2.12 | 0.39 |
| 104 | 344746 | Cultivar | China          | 3.67 | 6513.62 | 1533.14 | 288.71  | 308.86  | 0.72 | 0.35 |
| 105 | 344747 | Cultivar | China          | 1.17 | 1508.96 | 793.42  | 437.74  | 448.83  | 1.20 | 0.38 |
| 106 | 344748 | Cultivar | China          | 0.85 | 262.06  | 529.84  | 60.03   | 76.18   | 3.90 | 0.00 |
| 107 | 344749 | Cultivar | China          | 2.15 | 75.81   | 926.57  | 184.86  | 208.73  | 2.96 | 0.31 |
| 108 | 344750 | Cultivar | China          | 2.10 | 242.70  | 1380.36 | 126.67  | 137.14  | 4.65 | 0.00 |
| 109 | 344751 | Cultivar | Russia         | 1.21 | 29.23   | 171.41  | 257.55  | 295.52  | 3.19 | 0.00 |
| 110 | 344752 | landrace | China          | 0.56 | 18.07   | 209.23  | 148.68  | 166.91  | 2.17 | 0.22 |
| 111 | 344755 | landrace | Japan          | 0.89 | 1050.38 | 1263.56 | 15.40   | 18.13   | 1.27 | 0.52 |
| 112 | 344756 | landrace | China          | 1.53 | 52.43   | 184.02  | 237.05  | 270.54  | 3.37 | 0.17 |
| 113 | 344757 | Cultivar | South Korea    | 0.67 | 85.94   | 452.95  | 633.05  | 663.12  | 1.01 | 0.00 |
| 114 | 344758 | Cultivar | South Korea    | 0.65 | 1046.48 | 1768.34 | 27.10   | 32.37   | 1.84 | 0.00 |
| 115 | 344759 | Cultivar | South Korea    | 1.92 | 1033.07 | 1599.84 | 931.82  | 979.43  | 1.94 | 0.35 |
| 116 | 344760 | Cultivar | South Korea    | 1.44 | 372.60  | 1528.19 | 905.69  | 921.91  | 0.85 | 0.55 |

|     |        |                  |             |       |         |         |        |        |      |      |
|-----|--------|------------------|-------------|-------|---------|---------|--------|--------|------|------|
| 117 | 344761 | Genetic material | South Korea | 0.53  | 68.99   | 249.18  | 85.65  | 99.05  | 1.26 | 0.00 |
| 118 | 344763 | landrace         | China       | 0.52  | 199.16  | 212.46  | 129.73 | 156.07 | 0.80 | 0.00 |
| 119 | 344764 | Cultivar         | South Korea | 0.32  | 33.46   | 20.86   | 10.35  | 11.33  | 1.61 | 0.28 |
| 120 | 344765 | Cultivar         | South Korea | 4.16  | 1417.70 | 514.15  | 82.72  | 97.49  | 2.05 | 0.19 |
| 121 | 344766 | Cultivar         | South Korea | 0.95  | 291.09  | 1104.90 | 16.50  | 19.03  | 1.64 | 0.41 |
| 122 | 344767 | Cultivar         | South Korea | 2.01  | 1512.65 | 983.72  | 112.05 | 131.53 | 0.11 | 0.13 |
| 123 | 344768 | Cultivar         | South Korea | 11.63 | 3755.49 | 2351.99 | 366.60 | 415.87 | 0.23 | 0.40 |
| 124 | 344770 | Cultivar         | South Korea | 1.37  | 239.58  | 549.42  | 107.58 | 123.21 | 0.38 | 0.00 |
| 125 | 344771 | landrace         | China       | 0.55  | 120.74  | 453.42  | 184.06 | 213.73 | 1.41 | 0.19 |
| 126 | 344772 | landrace         | China       | 2.65  | 1829.43 | 1940.85 | 510.74 | 541.67 | 1.29 | 0.22 |
| 127 | 344773 | landrace         | China       | 1.01  | 223.93  | 514.05  | 97.76  | 120.47 | 0.94 | 0.00 |
| 128 | 344774 | landrace         | China       | 1.15  | 159.40  | 852.06  | 348.44 | 383.74 | 1.53 | 0.18 |
| 129 | 344775 | landrace         | Thailand    | 0.77  | 300.25  | 729.03  | 27.76  | 34.41  | 1.73 | 0.33 |
| 130 | 344776 | landrace         | Thailand    | 1.26  | 345.31  | 1173.17 | 120.18 | 143.48 | 0.89 | 0.11 |
| 131 | 344777 | landrace         | Thailand    | 1.62  | 1946.12 | 2408.90 | 334.92 | 382.22 | 1.00 | 0.47 |
| 132 | 344778 | landrace         | South Korea | 2.01  | 65.33   | 975.73  | 130.67 | 152.58 | 0.77 | 0.17 |
| 133 | 344779 | landrace         | South Korea | 0.74  | 493.17  | 1614.43 | 42.48  | 49.34  | 2.43 | 0.24 |
| 134 | 344780 | landrace         | South Korea | 1.46  | 859.02  | 1845.72 | 79.12  | 95.29  | 0.62 | 0.37 |

Table S1. Glucosinolates content in the 134 Chinese cabbage cabbage accessions (Cont'd)

| S/N | IT Number | Accession type | Origin | Glucorucic acid<br>(mol/kg DW) | Glucobrassicin<br>(mol/kg DW) | Glucobarbarin<br>(mol/kg DW) | Glucorapaeosin<br>(mol/kg DW) | Glucoraphanin<br>(mol/kg DW) | Sinigrabin<br>(mol/kg DW) | Glucoraphenin<br>(mol/kg DW) |
|-----|-----------|----------------|--------|--------------------------------|-------------------------------|------------------------------|-------------------------------|------------------------------|---------------------------|------------------------------|
| 1   | 100402    | landrace       | Taiwan | 0.39                           | 190.81                        | 126.40                       | 24.47                         | 0.18                         | 0.25                      | 0.10                         |
| 2   | 100405    | landrace       | Taiwan | 11.16                          | 393.77                        | 148.02                       | 1.61                          | 0.69                         | 0.00                      | 0.03                         |

|    |        |          |               |         |         |        |        |      |      |      |
|----|--------|----------|---------------|---------|---------|--------|--------|------|------|------|
| 3  | 100417 | landrace | Taiwan        | 1812.24 | 840.72  | 49.48  | 502.31 | 0.72 | 0.01 | 1.14 |
| 4  | 100422 | landrace | Taiwan        | 855.44  | 531.95  | 90.65  | 271.93 | 0.43 | 0.22 | 0.20 |
| 5  | 100437 | landrace | Taiwan        | 0.48    | 169.81  | 88.78  | 6.98   | 0.24 | 0.02 | 0.17 |
| 6  | 100439 | landrace | Taiwan        | 55.45   | 145.04  | 105.90 | 358.93 | 0.21 | 0.24 | 0.36 |
| 7  | 100451 | landrace | Taiwan        | 1.12    | 302.04  | 237.84 | 107.26 | 0.20 | 0.23 | 0.58 |
| 8  | 102914 | landrace | China         | 3.83    | 87.41   | 56.54  | 53.56  | 0.23 | 0.23 | 0.33 |
| 9  | 112275 | landrace | Japan         | 14.96   | 301.56  | 97.64  | 82.97  | 0.25 | 0.24 | 0.85 |
| 10 | 112664 | landrace | China         | 55.13   | 550.10  | 136.29 | 638.28 | 0.24 | 0.26 | 1.61 |
| 11 | 112665 | landrace | Japan         | 178.28  | 385.53  | 19.43  | 179.41 | 0.24 | 0.29 | 0.08 |
| 12 | 112667 | landrace | Japan         | 204.36  | 615.18  | 65.21  | 330.24 | 0.35 | 0.24 | 0.07 |
| 13 | 112821 | landrace | South Korea   | 0.70    | 39.24   | 89.57  | 465.45 | 0.18 | 0.24 | 0.03 |
| 14 | 113557 | landrace | South Korea   | 0.51    | 57.65   | 139.25 | 844.90 | 0.18 | 0.02 | 0.08 |
| 15 | 120022 | landrace | Netherland    | 648.00  | 527.32  | 99.28  | 323.57 | 0.96 | 0.24 | 0.09 |
| 16 | 120030 | landrace | United States | 127.87  | 372.23  | 191.04 | 264.20 | 0.30 | 0.02 | 0.09 |
| 17 | 120034 | landrace | Hong Kong     | 7.37    | 88.51   | 80.67  | 26.82  | 1.34 | 0.24 | 0.28 |
| 18 | 120036 | landrace | Hong Kong     | 356.17  | 518.36  | 91.68  | 133.27 | 0.90 | 0.23 | 0.20 |
| 19 | 120040 | landrace | Hong Kong     | 1062.39 | 915.99  | 72.06  | 290.94 | 0.44 | 0.21 | 0.47 |
| 20 | 120042 | landrace | Hong Kong     | 1362.38 | 479.72  | 80.57  | 425.75 | 1.47 | 0.00 | 0.22 |
| 21 | 120043 | landrace | Taiwan        | 309.54  | 1154.83 | 90.34  | 217.57 | 0.45 | 0.25 | 0.32 |
| 22 | 120044 | landrace | Taiwan        | 978.56  | 1604.40 | 126.70 | 499.72 | 1.76 | 0.00 | 1.75 |
| 23 | 120090 | landrace | Hongkong      | 611.77  | 361.38  | 36.25  | 30.94  | 0.40 | 0.24 | 0.11 |
| 24 | 141425 | landrace | South Korea   | 0.46    | 231.14  | 138.60 | 458.53 | 0.20 | 0.31 | 0.10 |
| 25 | 160325 | landrace | China         | 3.18    | 499.76  | 159.43 | 10.35  | 0.66 | 0.00 | 1.37 |
| 26 | 166986 | landrace | China         | 1037.20 | 491.45  | 93.78  | 36.62  | 0.84 | 0.26 | 3.32 |
| 27 | 186727 | landrace | Japan         | 2.17    | 307.10  | 117.93 | 160.82 | 0.24 | 0.22 | 0.23 |

|    |        |          |             |         |        |        |        |      |      |      |
|----|--------|----------|-------------|---------|--------|--------|--------|------|------|------|
| 28 | 186728 | landrace | Japan       | 1685.23 | 265.74 | 136.98 | 35.49  | 2.07 | 0.31 | 3.46 |
| 29 | 186729 | landrace | Japan       | 37.11   | 387.30 | 62.36  | 127.56 | 0.21 | 0.00 | 1.26 |
| 30 | 199696 | landrace | Japan       | 3.57    | 246.96 | 100.92 | 53.10  | 0.23 | 0.00 | 0.90 |
| 31 | 199704 | landrace | Australia   | 18.38   | 443.70 | 158.61 | 599.91 | 1.22 | 0.03 | 0.18 |
| 32 | 199710 | landrace | China       | 1.21    | 212.79 | 113.23 | 14.67  | 0.24 | 0.02 | 0.23 |
| 33 | 203324 | landrace | Russia      | 0.69    | 48.79  | 98.03  | 638.31 | 0.23 | 0.24 | 0.14 |
| 34 | 208851 | landrace | South Korea | 0.03    | 359.20 | 194.15 | 242.16 | 0.23 | 0.05 | 0.15 |
| 35 | 212912 | landrace | South Korea | 48.66   | 190.91 | 184.32 | 227.69 | 0.35 | 0.24 | 0.13 |
| 36 | 214688 | landrace | Korea       | 0.72    | 39.81  | 91.70  | 47.34  | 0.27 | 0.24 | 0.13 |
| 37 | 214998 | landrace | South Korea | 0.12    | 25.07  | 17.74  | 17.68  | 0.18 | 0.02 | 0.07 |
| 38 | 214999 | landrace | South Korea | 0.62    | 172.16 | 105.49 | 326.01 | 0.40 | 0.04 | 0.11 |
| 39 | 215000 | landrace | South Korea | 3.11    | 13.22  | 92.31  | 125.48 | 0.35 | 0.00 | 0.10 |
| 40 | 215001 | landrace | South Korea | 206.06  | 441.22 | 112.84 | 56.70  | 0.36 | 0.25 | 1.71 |
| 41 | 215002 | landrace | South Korea | 5.66    | 72.40  | 81.54  | 17.82  | 0.28 | 0.23 | 0.09 |
| 42 | 215006 | landrace | South Korea | 7.66    | 65.95  | 94.10  | 19.92  | 0.30 | 0.03 | 0.15 |
| 43 | 219621 | landrace | Brazil      | 6.31    | 74.98  | 95.07  | 123.54 | 0.22 | 0.03 | 0.31 |
| 44 | 221729 | landrace | China       | 119.83  | 238.88 | 51.01  | 505.14 | 0.44 | 0.03 | 0.08 |
| 45 | 221731 | landrace | China       | 3.47    | 130.57 | 118.35 | 812.36 | 0.23 | 0.23 | 0.24 |
| 46 | 221732 | landrace | China       | 16.79   | 167.26 | 109.35 | 25.01  | 0.24 | 0.26 | 0.35 |
| 47 | 221733 | landrace | China       | 28.33   | 18.64  | 42.51  | 3.61   | 0.20 | 0.04 | 0.03 |
| 48 | 221734 | landrace | China       | 0.34    | 47.25  | 102.12 | 325.94 | 0.18 | 0.23 | 0.26 |
| 49 | 221735 | landrace | China       | 4.30    | 695.93 | 190.31 | 658.65 | 0.18 | 0.23 | 1.10 |
| 50 | 221737 | landrace | China       | 131.47  | 507.44 | 45.14  | 626.95 | 0.37 | 0.22 | 0.27 |
| 51 | 221738 | landrace | China       | 10.94   | 207.11 | 184.63 | 281.98 | 0.19 | 0.04 | 0.44 |
| 52 | 221739 | landrace | China       | 74.52   | 273.98 | 245.22 | 241.76 | 0.27 | 0.21 | 0.85 |
| 53 | 221741 | landrace | China       | 176.82  | 230.16 | 151.20 | 41.51  | 0.48 | 0.02 | 0.24 |



|    |        |          |             |         |        |        |        |      |      |      |
|----|--------|----------|-------------|---------|--------|--------|--------|------|------|------|
| 54 | 221742 | landrace | China       | 1319.96 | 362.41 | 40.90  | 119.38 | 0.69 | 0.04 | 0.17 |
| 55 | 221746 | landrace | China       | 10.47   | 443.26 | 249.91 | 347.39 | 0.19 | 0.25 | 0.08 |
| 56 | 221751 | landrace | Japan       | 10.68   | 489.20 | 253.16 | 2.50   | 0.50 | 0.25 | 0.46 |
| 57 | 221752 | landrace | Japan       | 74.11   | 334.84 | 170.36 | 81.53  | 0.30 | 0.29 | 0.50 |
| 58 | 221754 | landrace | Japan       | 57.74   | 397.51 | 197.85 | 218.24 | 0.46 | 0.24 | 0.87 |
| 59 | 221755 | landrace | Japan       | 1.77    | 155.29 | 204.57 | 12.87  | 0.21 | 0.00 | 0.46 |
| 60 | 221760 | Cultivar | Taiwan      | 68.62   | 491.64 | 119.18 | 578.57 | 0.78 | 0.21 | 0.28 |
| 61 | 221787 | landrace | Japan       | 8.10    | 280.00 | 171.11 | 81.35  | 0.08 | 0.00 | 0.14 |
| 62 | 221789 | landrace | Japan       | 2.33    | 667.36 | 272.01 | 141.17 | 0.19 | 0.00 | 0.29 |
| 63 | 227012 | landrace | South Korea | 0.20    | 277.40 | 324.96 | 373.42 | 0.07 | 0.00 | 0.09 |
| 64 | 227013 | landrace | South Korea | 27.27   | 155.62 | 93.51  | 11.56  | 0.11 | 0.02 | 0.10 |
| 65 | 227906 | landrace | Uzbekistan  | 0.66    | 194.26 | 183.35 | 303.15 | 0.10 | 0.02 | 0.10 |
| 66 | 228181 | landrace | Japan       | 0.67    | 24.92  | 63.33  | 10.16  | 0.07 | 0.03 | 0.03 |
| 67 | 228195 | landrace | Peru        | 141.82  | 520.45 | 304.08 | 478.64 | 0.36 | 0.06 | 0.20 |
| 68 | 228854 | landrace | Uzbekistan  | 1.93    | 161.83 | 150.18 | 401.68 | 0.07 | 0.01 | 0.10 |
| 69 | 235343 | landrace | South Korea | 1.70    | 83.55  | 167.41 | 559.75 | 0.08 | 0.04 | 0.04 |
| 70 | 235413 | landrace | Germany     | 23.36   | 414.38 | 275.65 | 248.80 | 0.10 | 0.00 | 0.16 |
| 71 | 235966 | landrace | Kyrgyzstan  | 68.93   | 357.60 | 193.70 | 496.65 | 0.13 | 0.03 | 0.63 |
| 72 | 247931 | landrace | China       | 572.59  | 140.95 | 45.32  | 77.35  | 0.10 | 0.04 | 0.12 |
| 73 | 247932 | Cultivar | China       | 456.49  | 354.77 | 59.27  | 134.53 | 0.21 | 0.01 | 0.27 |
| 74 | 247938 | Cultivar | China       | 8.86    | 115.57 | 126.39 | 243.68 | 0.09 | 0.00 | 0.12 |
| 75 | 247960 | landrace | China       | 24.87   | 132.72 | 103.04 | 357.52 | 0.12 | 0.02 | 0.14 |
| 76 | 247966 | Cultivar | China       | 49.29   | 288.61 | 111.79 | 334.65 | 0.13 | 0.00 | 0.23 |
| 77 | 247979 | Cultivar | China       | 9.11    | 76.07  | 136.88 | 63.77  | 0.07 | 0.04 | 0.28 |
| 78 | 248400 | Cultivar | Japan       | 1.16    | 31.00  | 59.21  | 78.99  | 0.07 | 0.03 | 0.37 |
| 79 | 248599 | landrace | South Korea | 0.62    | 447.45 | 184.73 | 141.90 | 0.07 | 0.03 | 0.18 |

|     |        |          |                |         |        |        |        |      |      |      |
|-----|--------|----------|----------------|---------|--------|--------|--------|------|------|------|
| 80  | 251123 | Cultivar | China          | 0.64    | 144.53 | 35.66  | 86.14  | 0.14 | 0.03 | 0.58 |
| 81  | 260815 | Cultivar | China          | 0.58    | 473.86 | 383.92 | 183.59 | 0.13 | 0.03 | 0.19 |
| 82  | 278620 | landrace | Myanmar        | 3918.15 | 728.66 | 59.90  | 168.61 | 0.11 | 0.00 | 0.99 |
| 83  | 278640 | landrace | South Korea    | 2.45    | 64.13  | 129.41 | 96.31  | 0.09 | 0.00 | 0.05 |
| 84  | 278703 | landrace | South Korea    | 29.67   | 51.30  | 71.14  | 19.80  | 0.07 | 0.01 | 0.11 |
| 85  | 293003 | landrace | Mongolia       | 109.58  | 296.24 | 195.71 | 140.08 | 0.11 | 0.05 | 0.13 |
| 86  | 293004 | landrace | Mongolia       | 0.76    | 193.31 | 163.88 | 268.17 | 0.07 | 0.03 | 0.68 |
| 87  | 293076 | landrace | Austria        | 0.66    | 228.20 | 40.43  | 35.94  | 0.09 | 0.00 | 0.18 |
| 88  | 321040 | landrace | South Korea    | 0.11    | 101.87 | 106.70 | 143.44 | 0.08 | 0.00 | 0.19 |
| 89  | 321041 | landrace | South Korea    | 0.23    | 18.10  | 48.55  | 175.91 | 0.08 | 0.00 | 0.05 |
| 90  | 327479 | Cultivar | China          | 3.32    | 427.69 | 54.07  | 460.08 | 0.12 | 0.00 | 0.03 |
| 91  | 336315 | landrace | South Korea    | 3.16    | 11.01  | 36.06  | 188.33 | 0.00 | 0.00 | 0.00 |
| 92  | 339601 | Cultivar | South Korea    | 315.58  | 574.49 | 63.81  | 237.83 | 0.00 | 0.01 | 1.58 |
| 93  | 339602 | landrace | South Korea    | 10.21   | 23.76  | 48.11  | 213.42 | 0.02 | 0.00 | 0.41 |
| 94  | 344732 | landrace | Malaysia       | 186.88  | 491.27 | 124.74 | 1.73   | 0.19 | 0.01 | 0.25 |
| 95  | 344733 | landrace | Japan          | 50.84   | 102.17 | 61.05  | 18.92  | 0.02 | 0.01 | 0.25 |
| 96  | 344734 | landrace | Japan          | 24.44   | 82.45  | 81.81  | 358.89 | 0.09 | 0.09 | 0.19 |
| 97  | 344735 | landrace | Newzealand     | 99.49   | 516.91 | 99.51  | 389.29 | 0.70 | 0.02 | 0.42 |
| 98  | 344736 | landrace | Austria        | 71.25   | 204.38 | 81.37  | 416.58 | 0.03 | 0.01 | 0.23 |
| 99  | 344737 | landrace | Austria        | 0.67    | 263.69 | 119.61 | 474.27 | 0.00 | 0.02 | 0.47 |
| 100 | 344740 | landrace | France         | 2000.28 | 359.01 | 46.69  | 88.15  | 0.24 | 0.01 | 0.77 |
| 101 | 344741 | landrace | Netherland     | 99.99   | 79.37  | 31.10  | 168.34 | 0.01 | 0.02 | 0.31 |
| 102 | 344742 | landrace | United Kingdom | 72.15   | 631.45 | 66.04  | 462.39 | 0.01 | 0.08 | 1.16 |
| 103 | 344743 | Cultivar | Russia         | 4.12    | 178.12 | 163.76 | 150.90 | 0.00 | 0.00 | 0.16 |
| 104 | 344746 | Cultivar | China          | 189.18  | 247.85 | 87.23  | 14.65  | 0.49 | 0.07 | 3.43 |

|     |        |                  |             |        |        |        |        |      |      |      |
|-----|--------|------------------|-------------|--------|--------|--------|--------|------|------|------|
| 105 | 344747 | Cultivar         | China       | 13.61  | 35.37  | 83.10  | 116.76 | 0.07 | 0.01 | 0.36 |
| 106 | 344748 | Cultivar         | China       | 0.11   | 30.04  | 105.14 | 115.67 | 0.00 | 0.00 | 0.17 |
| 107 | 344749 | Cultivar         | China       | 0.66   | 89.46  | 91.24  | 547.02 | 0.08 | 0.00 | 0.24 |
| 108 | 344750 | Cultivar         | China       | 5.22   | 172.17 | 36.15  | 176.23 | 0.13 | 0.01 | 0.18 |
| 109 | 344751 | Cultivar         | Russia      | 183.23 | 254.72 | 138.73 | 206.96 | 0.29 | 0.03 | 0.15 |
| 110 | 344752 | landrace         | China       | 1.60   | 44.00  | 55.72  | 543.34 | 0.00 | 0.00 | 0.15 |
| 111 | 344755 | landrace         | Japan       | 0.33   | 20.83  | 52.36  | 4.07   | 0.00 | 0.01 | 0.21 |
| 112 | 344756 | landrace         | China       | 210.21 | 273.16 | 127.71 | 224.85 | 1.13 | 0.03 | 0.21 |
| 113 | 344757 | Cultivar         | South Korea | 240.00 | 438.75 | 142.20 | 627.02 | 0.08 | 0.01 | 0.59 |
| 114 | 344758 | Cultivar         | South Korea | 1.01   | 157.83 | 32.95  | 5.18   | 0.00 | 0.04 | 0.54 |
| 115 | 344759 | Cultivar         | South Korea | 476.16 | 438.76 | 61.79  | 326.84 | 0.24 | 0.00 | 1.13 |
| 116 | 344760 | Cultivar         | South Korea | 33.14  | 572.36 | 166.73 | 931.81 | 0.06 | 0.01 | 0.60 |
| 117 | 344761 | Genetic material | South Korea | 54.58  | 264.37 | 80.37  | 163.48 | 0.08 | 0.00 | 0.14 |
| 118 | 344763 | landrace         | China       | 89.82  | 60.42  | 68.45  | 51.12  | 0.00 | 0.01 | 0.37 |
| 119 | 344764 | Cultivar         | South Korea | 2.04   | 7.94   | 25.89  | 7.61   | 0.00 | 0.02 | 0.12 |
| 120 | 344765 | Cultivar         | South Korea | 0.79   | 49.46  | 34.69  | 12.46  | 0.12 | 0.00 | 0.34 |
| 121 | 344766 | Cultivar         | South Korea | 0.15   | 62.16  | 57.29  | 20.47  | 0.01 | 0.09 | 0.08 |
| 122 | 344767 | Cultivar         | South Korea | 86.17  | 271.58 | 80.24  | 28.25  | 0.33 | 0.04 | 0.58 |
| 123 | 344768 | Cultivar         | South Korea | 495.04 | 556.69 | 62.90  | 76.72  | 1.93 | 0.02 | 0.85 |
| 124 | 344770 | Cultivar         | South Korea | 210.22 | 550.82 | 23.73  | 65.99  | 0.28 | 0.02 | 0.27 |
| 125 | 344771 | landrace         | China       | 5.02   | 129.34 | 39.92  | 219.15 | 0.05 | 0.00 | 0.53 |
| 126 | 344772 | landrace         | China       | 69.21  | 747.54 | 80.62  | 168.04 | 0.48 | 0.04 | 1.52 |
| 127 | 344773 | landrace         | China       | 49.50  | 69.76  | 47.73  | 55.27  | 0.18 | 0.03 | 0.29 |
| 128 | 344774 | landrace         | China       | 59.26  | 469.40 | 64.07  | 280.99 | 0.49 | 0.00 | 0.60 |
| 129 | 344775 | landrace         | Thailand    | 2.70   | 40.94  | 38.35  | 28.90  | 0.08 | 0.00 | 0.23 |

|     |        |          |             |        |        |        |        |      |      |      |
|-----|--------|----------|-------------|--------|--------|--------|--------|------|------|------|
| 130 | 344776 | landrace | Thailand    | 19.60  | 61.51  | 59.68  | 53.33  | 0.10 | 0.03 | 0.92 |
| 131 | 344777 | landrace | Thailand    | 107.70 | 243.41 | 102.07 | 140.63 | 0.04 | 0.03 | 0.91 |
| 132 | 344778 | landrace | South Korea | 0.73   | 49.84  | 59.22  | 695.04 | 0.03 | 0.05 | 0.01 |
| 133 | 344779 | landrace | South Korea | 0.03   | 157.62 | 52.05  | 40.71  | 0.00 | 0.00 | 0.28 |
| 134 | 344780 | landrace | South Korea | 0.07   | 76.80  | 52.87  | 32.12  | 0.02 | 0.01 | 0.13 |

Table S1. Glucosinolates content in the 134 Chinese cabbage accessions (Cont'd)

| S/N | IT Number | Accession type | Origin        | Glucoraphanin (mol/kg DW) | Glucocheirolin (mol/kg DW) | Glucoalyssin (mol/kg DW) | 4-Hydroxyglucobrassicin (mol/kg DW) | Neoglucobrassicin (mol/kg DW) | 4-Methoxyglucobrassicin (mol/kg DW) | Total glucosinolate (mol/kg DW) |
|-----|-----------|----------------|---------------|---------------------------|----------------------------|--------------------------|-------------------------------------|-------------------------------|-------------------------------------|---------------------------------|
| 1   | 100402    | landrace       | Taiwan        | 23.23                     | 0.80                       | 82.42                    | 17.50                               | 143.05                        | 64.11                               | 4177.45                         |
| 2   | 100405    | landrace       | Taiwan        | 368.59                    | 12.30                      | 292.02                   | 38.37                               | 438.93                        | 189.91                              | 3854.74                         |
| 3   | 100417    | landrace       | Taiwan        | 873.16                    | 29.85                      | 1419.28                  | 35.01                               | 115.40                        | 1024.37                             | 13869.67                        |
| 4   | 100422    | landrace       | Taiwan        | 508.04                    | 16.96                      | 1227.79                  | 16.04                               | 245.97                        | 751.64                              | 7005.12                         |
| 5   | 100437    | landrace       | Taiwan        | 21.64                     | 0.44                       | 78.27                    | 19.84                               | 201.25                        | 149.73                              | 5809.44                         |
| 6   | 100439    | landrace       | Taiwan        | 72.55                     | 2.25                       | 231.85                   | 308.68                              | 216.82                        | 413.97                              | 8081.16                         |
| 7   | 100451    | landrace       | Taiwan        | 4.15                      | 0.26                       | 38.18                    | 39.98                               | 193.54                        | 507.91                              | 7972.64                         |
| 8   | 102914    | landrace       | China         | 23.11                     | 0.72                       | 140.65                   | 10.78                               | 107.86                        | 409.55                              | 2962.43                         |
| 9   | 112275    | landrace       | Japan         | 92.38                     | 1.65                       | 192.10                   | 147.13                              | 47.02                         | 312.96                              | 3552.50                         |
| 10  | 112664    | landrace       | China         | 323.55                    | 7.79                       | 1081.42                  | 432.50                              | 320.53                        | 573.47                              | 12260.28                        |
| 11  | 112665    | landrace       | Japan         | 139.44                    | 2.81                       | 499.14                   | 29.61                               | 100.38                        | 344.22                              | 2503.52                         |
| 12  | 112667    | landrace       | Japan         | 129.30                    | 3.21                       | 562.77                   | 172.62                              | 190.70                        | 1187.40                             | 4999.98                         |
| 13  | 112821    | landrace       | South Korea   | 17.07                     | 0.37                       | 79.11                    | 19.00                               | 805.82                        | 451.04                              | 3846.15                         |
| 14  | 113557    | landrace       | South Korea   | 12.76                     | 0.28                       | 53.58                    | 98.66                               | 543.84                        | 288.48                              | 5139.14                         |
| 15  | 120022    | landrace       | Netherland    | 482.34                    | 9.87                       | 1521.71                  | 244.88                              | 450.15                        | 1112.16                             | 7702.51                         |
| 16  | 120030    | landrace       | United States | 213.05                    | 4.19                       | 880.28                   | 229.02                              | 663.50                        | 327.76                              | 4189.10                         |
| 17  | 120034    | landrace       | Hong Kong     | 481.95                    | 9.59                       | 370.39                   | 15.51                               | 87.42                         | 262.05                              | 2969.15                         |

|    |        |          |             |         |       |         |        |         |         |          |
|----|--------|----------|-------------|---------|-------|---------|--------|---------|---------|----------|
| 18 | 120036 | landrace | Hong Kong   | 214.64  | 4.46  | 650.92  | 11.21  | 141.32  | 704.96  | 7210.56  |
| 19 | 120040 | landrace | Hong Kong   | 592.53  | 12.91 | 1543.68 | 12.01  | 126.51  | 817.88  | 12036.27 |
| 20 | 120042 | landrace | Hong Kong   | 456.91  | 10.93 | 1582.32 | 16.67  | 261.28  | 775.64  | 10596.15 |
| 21 | 120043 | landrace | Taiwan      | 111.78  | 2.51  | 597.07  | 126.58 | 150.44  | 954.12  | 8053.91  |
| 22 | 120044 | landrace | Taiwan      | 499.89  | 13.23 | 2147.02 | 18.96  | 271.10  | 1205.12 | 21199.02 |
| 23 | 120090 | landrace | Hongkong    | 408.92  | 8.60  | 672.32  | 24.34  | 189.83  | 668.00  | 5593.56  |
| 24 | 141425 | landrace | South Korea | 24.89   | 0.47  | 130.96  | 63.78  | 1116.42 | 270.25  | 4469.77  |
| 25 | 160325 | landrace | China       | 81.41   | 2.06  | 147.70  | 31.16  | 347.01  | 179.08  | 12707.70 |
| 26 | 166986 | landrace | China       | 338.41  | 6.90  | 189.97  | 24.54  | 125.95  | 126.57  | 7876.17  |
| 27 | 186727 | landrace | Japan       | 15.16   | 0.40  | 180.27  | 329.81 | 53.74   | 550.45  | 6356.84  |
| 28 | 186728 | landrace | Japan       | 4242.08 | 87.44 | 244.69  | 23.80  | 190.19  | 646.66  | 18009.37 |
| 29 | 186729 | landrace | Japan       | 133.83  | 2.55  | 171.57  | 33.54  | 65.48   | 610.10  | 4038.99  |
| 30 | 199696 | landrace | Japan       | 19.40   | 0.52  | 103.50  | 36.14  | 220.65  | 687.40  | 5488.98  |
| 31 | 199704 | landrace | Australia   | 90.12   | 1.29  | 904.98  | 122.52 | 246.20  | 319.65  | 6501.13  |
| 32 | 199710 | landrace | China       | 11.90   | 0.25  | 33.00   | 268.80 | 78.25   | 207.58  | 8689.35  |
| 33 | 203324 | landrace | Russia      | 11.62   | 0.38  | 54.53   | 22.56  | 364.07  | 192.25  | 3472.41  |
| 34 | 208851 | landrace | South Korea | 12.00   | 0.40  | 26.10   | 26.54  | 668.23  | 243.51  | 6504.31  |
| 35 | 212912 | landrace | South Korea | 86.21   | 1.63  | 275.31  | 59.35  | 150.83  | 644.16  | 2888.43  |
| 36 | 214688 | landrace | Korea       | 31.74   | 0.57  | 87.58   | 5.51   | 93.37   | 127.55  | 917.50   |
| 37 | 214998 | landrace | South Korea | 3.36    | 0.07  | 16.31   | 26.55  | 83.29   | 147.79  | 2170.04  |
| 38 | 214999 | landrace | South Korea | 28.53   | 0.26  | 171.20  | 16.45  | 226.91  | 233.28  | 5274.09  |
| 39 | 215000 | landrace | South Korea | 142.19  | 2.54  | 593.64  | 34.48  | 225.29  | 404.87  | 3543.20  |
| 40 | 215001 | landrace | South Korea | 43.00   | 0.95  | 70.80   | 46.22  | 372.00  | 160.34  | 9134.44  |
| 41 | 215002 | landrace | South Korea | 126.85  | 1.88  | 313.42  | 276.70 | 105.92  | 211.02  | 1819.95  |
| 42 | 215006 | landrace | South Korea | 22.99   | 0.59  | 380.37  | 30.70  | 257.34  | 636.78  | 3895.25  |
| 43 | 219621 | landrace | Brazil      | 207.39  | 3.98  | 154.11  | 28.66  | 189.28  | 274.53  | 10750.76 |
| 44 | 221729 | landrace | China       | 51.13   | 1.55  | 297.01  | 30.50  | 236.06  | 582.94  | 4039.75  |

|    |        |          |             |        |       |         |        |         |        |          |
|----|--------|----------|-------------|--------|-------|---------|--------|---------|--------|----------|
| 45 | 221731 | landrace | China       | 24.22  | 0.48  | 283.73  | 14.96  | 295.92  | 430.91 | 4757.30  |
| 46 | 221732 | landrace | China       | 183.94 | 5.13  | 540.54  | 43.87  | 139.17  | 295.89 | 3199.30  |
| 47 | 221733 | landrace | China       | 46.27  | 1.32  | 92.22   | 20.12  | 183.12  | 180.06 | 689.61   |
| 48 | 221734 | landrace | China       | 3.07   | 0.35  | 150.95  | 51.24  | 375.03  | 300.34 | 5908.67  |
| 49 | 221735 | landrace | China       | 68.87  | 2.20  | 530.07  | 37.01  | 372.90  | 384.80 | 9849.19  |
| 50 | 221737 | landrace | China       | 145.43 | 4.14  | 1045.96 | 110.30 | 273.91  | 709.66 | 5762.47  |
| 51 | 221738 | landrace | China       | 44.37  | 1.67  | 192.14  | 79.85  | 174.14  | 653.63 | 5539.32  |
| 52 | 221739 | landrace | China       | 151.83 | 5.48  | 394.99  | 97.63  | 152.02  | 621.77 | 7048.87  |
| 53 | 221741 | landrace | China       | 74.17  | 3.29  | 735.20  | 10.61  | 43.03   | 331.13 | 3769.19  |
| 54 | 221742 | landrace | China       | 598.63 | 27.30 | 916.92  | 39.93  | 33.02   | 840.78 | 7228.52  |
| 55 | 221746 | landrace | China       | 29.10  | 1.40  | 297.52  | 15.88  | 51.25   | 190.29 | 4357.97  |
| 56 | 221751 | landrace | Japan       | 33.08  | 1.07  | 1147.41 | 21.80  | 87.37   | 131.57 | 8931.29  |
| 57 | 221752 | landrace | Japan       | 276.50 | 12.96 | 513.49  | 60.23  | 82.33   | 159.88 | 6622.27  |
| 58 | 221754 | landrace | Japan       | 181.75 | 7.77  | 424.86  | 100.41 | 100.89  | 294.29 | 15549.54 |
| 59 | 221755 | landrace | Japan       | 37.98  | 1.31  | 242.79  | 96.35  | 85.22   | 173.84 | 8908.85  |
| 60 | 221760 | Cultivar | Taiwan      | 62.74  | 2.65  | 866.74  | 20.98  | 120.57  | 794.77 | 7668.30  |
| 61 | 221787 | landrace | Japan       | 17.46  | 0.66  | 217.81  | 22.67  | 129.90  | 550.33 | 4959.85  |
| 62 | 221789 | landrace | Japan       | 22.26  | 1.06  | 121.90  | 12.11  | 240.84  | 297.48 | 16680.10 |
| 63 | 227012 | landrace | South Korea | 1.32   | 0.14  | 7.06    | 21.65  | 247.92  | 411.51 | 10481.89 |
| 64 | 227013 | landrace | South Korea | 43.78  | 2.15  | 173.38  | 12.78  | 84.19   | 246.63 | 3918.24  |
| 65 | 227906 | landrace | Uzbekistan  | 4.85   | 0.49  | 77.16   | 192.61 | 63.61   | 199.19 | 11086.76 |
| 66 | 228181 | landrace | Japan       | 1.14   | 0.18  | 12.26   | 9.31   | 59.05   | 311.07 | 1932.28  |
| 67 | 228195 | landrace | Peru        | 130.46 | 6.05  | 1062.92 | 119.66 | 1088.22 | 111.04 | 7204.90  |
| 68 | 228854 | landrace | Uzbekistan  | 20.39  | 0.83  | 101.92  | 22.48  | 172.30  | 153.87 | 5274.08  |
| 69 | 235343 | landrace | South Korea | 12.85  | 0.39  | 35.73   | 63.16  | 374.03  | 85.80  | 4429.86  |
| 70 | 235413 | landrace | Germany     | 23.83  | 0.33  | 337.10  | 40.52  | 176.27  | 356.19 | 5289.47  |
| 71 | 235966 | landrace | Kyrgyzstan  | 114.49 | 4.82  | 531.92  | 10.33  | 154.41  | 339.67 | 9361.69  |

|    |        |          |             |        |       |         |        |         |        |          |
|----|--------|----------|-------------|--------|-------|---------|--------|---------|--------|----------|
| 72 | 247931 | landrace | China       | 125.10 | 5.00  | 401.15  | 12.21  | 59.47   | 356.56 | 3757.14  |
| 73 | 247932 | Cultivar | China       | 185.31 | 8.02  | 885.83  | 3.72   | 96.91   | 430.34 | 8155.58  |
| 74 | 247938 | Cultivar | China       | 15.69  | 0.62  | 130.11  | 28.18  | 45.66   | 191.50 | 2453.56  |
| 75 | 247960 | landrace | China       | 23.30  | 0.81  | 217.78  | 12.73  | 355.03  | 320.24 | 3932.62  |
| 76 | 247966 | Cultivar | China       | 54.78  | 1.58  | 364.62  | 15.89  | 128.74  | 503.75 | 4509.39  |
| 77 | 247979 | Cultivar | China       | 43.40  | 1.96  | 100.36  | 41.01  | 232.00  | 274.70 | 4054.70  |
| 78 | 248400 | Cultivar | Japan       | 9.53   | 0.35  | 5.10    | 33.43  | 66.07   | 209.86 | 9739.93  |
| 79 | 248599 | landrace | South Korea | 3.97   | 0.19  | 10.83   | 11.66  | 364.76  | 176.92 | 7023.03  |
| 80 | 251123 | Cultivar | China       | 60.97  | 1.81  | 403.89  | 32.94  | 553.47  | 140.24 | 7565.01  |
| 81 | 260815 | Cultivar | China       | 10.37  | 0.37  | 30.46   | 25.98  | 319.18  | 113.81 | 10879.35 |
| 82 | 278620 | landrace | Myanmar     | 437.83 | 14.46 | 1002.28 | 170.25 | 34.04   | 308.68 | 14007.51 |
| 83 | 278640 | landrace | South Korea | 22.03  | 0.54  | 83.14   | 16.41  | 125.91  | 165.14 | 3364.57  |
| 84 | 278703 | landrace | South Korea | 34.85  | 0.78  | 101.93  | 6.56   | 57.42   | 283.89 | 1259.30  |
| 85 | 293003 | landrace | Mongolia    | 169.73 | 4.46  | 550.31  | 23.85  | 200.71  | 426.35 | 5412.34  |
| 86 | 293004 | landrace | Mongolia    | 29.67  | 0.75  | 155.28  | 39.87  | 236.28  | 406.19 | 6460.83  |
| 87 | 293076 | landrace | Austria     | 5.87   | 0.27  | 51.02   | 7.34   | 191.45  | 527.39 | 2710.37  |
| 88 | 321040 | landrace | South Korea | 7.80   | 0.41  | 10.66   | 7.61   | 154.69  | 92.03  | 2487.04  |
| 89 | 321041 | landrace | South Korea | 9.01   | 0.27  | 13.11   | 9.98   | 743.17  | 242.57 | 1674.02  |
| 90 | 327479 | Cultivar | China       | 9.61   | 0.31  | 149.40  | 16.58  | 90.42   | 582.37 | 5073.52  |
| 91 | 336315 | landrace | South Korea | 28.83  | 0.82  | 78.94   | 18.80  | 220.23  | 310.66 | 1432.55  |
| 92 | 339601 | Cultivar | South Korea | 95.20  | 3.00  | 318.66  | 20.45  | 253.46  | 738.79 | 7467.80  |
| 93 | 339602 | landrace | South Korea | 75.15  | 1.84  | 162.65  | 9.93   | 27.54   | 196.20 | 1788.30  |
| 94 | 344732 | landrace | Malaysia    | 787.60 | 18.94 | 589.75  | 6.65   | 38.07   | 143.42 | 4722.85  |
| 95 | 344733 | landrace | Japan       | 119.23 | 3.02  | 231.64  | 10.20  | 264.94  | 543.99 | 2483.11  |
| 96 | 344734 | landrace | Japan       | 110.94 | 2.22  | 1150.11 | 23.25  | 53.79   | 322.42 | 4728.39  |
| 97 | 344735 | landrace | Newzealand  | 173.60 | 3.62  | 1318.12 | 223.98 | 659.68  | 526.24 | 6544.94  |
| 98 | 344736 | landrace | Austria     | 71.03  | 1.55  | 729.85  | 19.59  | 1385.02 | 346.17 | 4537.28  |

|     |        |                  |                |        |       |         |        |        |         |          |
|-----|--------|------------------|----------------|--------|-------|---------|--------|--------|---------|----------|
| 99  | 344737 | landrace         | Austria        | 10.59  | 0.25  | 64.13   | 43.66  | 113.12 | 439.87  | 4798.12  |
| 100 | 344740 | landrace         | France         | 464.67 | 13.47 | 2023.80 | 796.51 | 448.30 | 2016.69 | 11215.58 |
| 101 | 344741 | landrace         | Netherland     | 89.07  | 2.14  | 484.38  | 25.44  | 262.95 | 872.66  | 3091.68  |
| 102 | 344742 | landrace         | United Kingdom | 190.77 | 3.85  | 440.00  | 67.35  | 216.84 | 777.45  | 7204.37  |
| 103 | 344743 | Cultivar         | Russia         | 8.87   | 0.18  | 190.07  | 9.84   | 191.20 | 462.68  | 7263.08  |
| 104 | 344746 | Cultivar         | China          | 568.60 | 14.79 | 525.59  | 30.53  | 105.69 | 131.42  | 10568.57 |
| 105 | 344747 | Cultivar         | China          | 218.24 | 5.12  | 107.84  | 32.77  | 576.56 | 170.54  | 4552.04  |
| 106 | 344748 | Cultivar         | China          | 12.41  | 0.27  | 31.34   | 18.76  | 499.87 | 204.98  | 1951.64  |
| 107 | 344749 | Cultivar         | China          | 34.77  | 0.78  | 436.03  | 33.23  | 727.65 | 386.06  | 3748.61  |
| 108 | 344750 | Cultivar         | China          | 8.42   | 0.17  | 201.71  | 10.12  | 117.91 | 318.42  | 2940.46  |
| 109 | 344751 | Cultivar         | Russia         | 108.37 | 2.68  | 831.87  | 78.68  | 739.27 | 541.22  | 3844.31  |
| 110 | 344752 | landrace         | China          | 43.66  | 1.44  | 198.83  | 16.41  | 123.42 | 236.67  | 1811.09  |
| 111 | 344755 | landrace         | Japan          | 13.01  | 0.25  | 29.50   | 21.68  | 80.10  | 384.12  | 2956.63  |
| 112 | 344756 | landrace         | China          | 442.96 | 11.58 | 1221.90 | 48.60  | 622.45 | 354.94  | 4288.84  |
| 113 | 344757 | Cultivar         | South Korea    | 331.58 | 7.24  | 854.49  | 187.46 | 143.42 | 261.47  | 5071.04  |
| 114 | 344758 | Cultivar         | South Korea    | 8.31   | 0.18  | 25.43   | 5.57   | 195.15 | 394.10  | 3703.08  |
| 115 | 344759 | Cultivar         | South Korea    | 622.39 | 17.18 | 1223.67 | 9.90   | 149.57 | 1038.65 | 8914.63  |
| 116 | 344760 | Cultivar         | South Korea    | 68.17  | 1.43  | 511.50  | 166.97 | 186.31 | 779.55  | 7149.87  |
| 117 | 344761 | Genetic material | South Korea    | 43.00  | 0.42  | 220.73  | 25.35  | 205.16 | 497.11  | 2059.46  |
| 118 | 344763 | landrace         | China          | 171.47 | 3.90  | 306.03  | 13.04  | 116.58 | 492.67  | 2072.60  |
| 119 | 344764 | Cultivar         | South Korea    | 33.63  | 0.86  | 29.09   | 18.45  | 252.26 | 170.40  | 626.53   |
| 120 | 344765 | Cultivar         | South Korea    | 27.64  | 1.03  | 32.15   | 24.45  | 497.95 | 368.93  | 3168.45  |
| 121 | 344766 | Cultivar         | South Korea    | 1.44   | 0.09  | 10.82   | 14.80  | 137.70 | 589.83  | 2329.44  |
| 122 | 344767 | Cultivar         | South Korea    | 316.87 | 7.04  | 500.91  | 18.92  | 92.37  | 339.33  | 4484.83  |
| 123 | 344768 | Cultivar         | South Korea    | 407.48 | 11.05 | 1632.50 | 123.07 | 122.31 | 1417.95 | 11810.73 |
| 124 | 344770 | Cultivar         | South Korea    | 289.88 | 7.76  | 790.31  | 36.26  | 87.65  | 639.56  | 3724.29  |



|     |        |          |             |        |      |        |        |        |         |         |
|-----|--------|----------|-------------|--------|------|--------|--------|--------|---------|---------|
| 125 | 344771 | landrace | China       | 20.17  | 0.62 | 172.69 | 45.92  | 311.99 | 932.72  | 2852.22 |
| 126 | 344772 | landrace | China       | 140.13 | 3.75 | 477.41 | 31.83  | 238.70 | 1208.22 | 7994.34 |
| 127 | 344773 | landrace | China       | 137.23 | 3.37 | 480.32 | 27.43  | 69.20  | 352.83  | 2251.29 |
| 128 | 344774 | landrace | China       | 97.34  | 2.26 | 825.19 | 118.76 | 339.11 | 1450.30 | 5454.28 |
| 129 | 344775 | landrace | Thailand    | 28.29  | 0.78 | 149.61 | 19.87  | 213.03 | 334.44  | 1951.50 |
| 130 | 344776 | landrace | Thailand    | 102.52 | 2.55 | 542.11 | 32.61  | 78.52  | 599.62  | 3337.48 |
| 131 | 344777 | landrace | Thailand    | 247.59 | 5.88 | 453.86 | 38.10  | 970.83 | 875.28  | 8261.56 |
| 132 | 344778 | landrace | South Korea | 36.12  | 0.60 | 268.88 | 136.39 | 219.08 | 130.40  | 2923.66 |
| 133 | 344779 | landrace | South Korea | 4.61   | 0.09 | 25.92  | 29.78  | 352.74 | 768.23  | 3634.89 |
| 134 | 344780 | landrace | South Korea | 21.00  | 0.58 | 35.16  | 36.54  | 422.20 | 167.03  | 3726.14 |

Table S2. List of Chinese cabbage accessions used in the study and their origin

| S/N | IT Number | Accession Type | Origin        | Abbereviation |
|-----|-----------|----------------|---------------|---------------|
| 1   | IT100402  | landrace       | Taiwan        | TWN           |
| 2   | IT100405  | landrace       | Taiwan        | TWN           |
| 3   | IT100417  | landrace       | Taiwan        | TWN           |
| 4   | IT100422  | landrace       | Taiwan        | TWN           |
| 5   | IT100437  | landrace       | Taiwan        | TWN           |
| 6   | IT100439  | landrace       | Taiwan        | TWN           |
| 7   | IT100451  | landrace       | Taiwan        | TWN           |
| 8   | IT102914  | landrace       | China         | CHN           |
| 8   | IT112275  | landrace       | Japan         | JPN           |
| 10  | IT112664  | landrace       | China         | CHN           |
| 11  | IT112665  | landrace       | Japan         | JPN           |
| 12  | IT112667  | landrace       | Japan         | JPN           |
| 13  | IT112821  | landrace       | South Korea   | KOR           |
| 14  | IT113557  | landrace       | South Korea   | KOR           |
| 15  | IT120022  | landrace       | Netherland    | NLD           |
| 16  | IT120030  | landrace       | United States | USA           |
| 17  | IT120034  | landrace       | Hong Kong     | HKG           |

|    |          |          |             |     |
|----|----------|----------|-------------|-----|
| 18 | IT120036 | landrace | Hong Kong   | HKG |
| 19 | IT120040 | landrace | Hong Kong   | HKG |
| 20 | IT120042 | landrace | Hong Kong   | HKG |
| 21 | IT120043 | landrace | Taiwan      | TWN |
| 22 | IT120044 | landrace | Taiwan      | TWN |
| 23 | IT120090 | landrace | Hongkong    | HKG |
| 24 | IT141425 | landrace | South Korea | KOR |
| 25 | IT160325 | landrace | China       | CHN |
| 26 | IT166986 | landrace | China       | CHN |
| 27 | IT186727 | landrace | Japan       | JPN |
| 28 | IT186728 | landrace | Japan       | JPN |
| 29 | IT186729 | landrace | Japan       | JPN |
| 30 | IT199696 | landrace | Japan       | JPN |
| 31 | IT199704 | landrace | Australia   | AUS |
| 32 | IT199710 | landrace | China       | CHN |
| 33 | IT203324 | landrace | Russia      | RUS |
| 34 | IT208851 | landrace | South Korea | KOR |
| 35 | IT212912 | landrace | South Korea | KOR |
| 36 | IT214688 | landrace | Korea       | PRK |
| 37 | IT214998 | landrace | South Korea | KOR |
| 38 | IT214999 | landrace | South Korea | KOR |
| 39 | IT215000 | landrace | South Korea | KOR |
| 40 | IT215001 | landrace | South Korea | KOR |
| 41 | IT215002 | landrace | South Korea | KOR |
| 42 | IT215006 | landrace | South Korea | KOR |
| 43 | IT219621 | landrace | Brazil      | BRA |
| 44 | IT221729 | landrace | China       | CHN |
| 45 | IT221731 | landrace | China       | CHN |
| 46 | IT221732 | landrace | China       | CHN |
| 47 | IT221733 | landrace | China       | CHN |
| 48 | IT221734 | landrace | China       | CHN |
| 49 | IT221735 | landrace | China       | CHN |
| 50 | IT221737 | landrace | China       | CHN |

|    |          |          |             |     |
|----|----------|----------|-------------|-----|
| 51 | IT221738 | landrace | China       | CHN |
| 52 | IT221739 | landrace | China       | CHN |
| 53 | IT221741 | landrace | China       | CHN |
| 54 | IT221742 | landrace | China       | CHN |
| 55 | IT221746 | landrace | China       | CHN |
| 56 | IT221751 | landrace | Japan       | JPN |
| 57 | IT221752 | landrace | Japan       | JPN |
| 58 | IT221754 | landrace | Japan       | JPN |
| 59 | IT221755 | landrace | Japan       | JPN |
| 60 | IT221760 | Cultivar | Taiwan      | TWN |
| 61 | IT221787 | landrace | Japan       | JPN |
| 62 | IT221789 | landrace | Japan       | JPN |
| 63 | IT227012 | landrace | South Korea | KOR |
| 64 | IT227013 | landrace | South Korea | KOR |
| 65 | IT227906 | landrace | Uzbekistan  | UZB |
| 66 | IT228181 | landrace | Japan       | JPN |
| 67 | IT228195 | landrace | Peru        | PER |
| 68 | IT228854 | landrace | Uzbekistan  | UZB |
| 69 | IT235343 | landrace | South Korea | KOR |
| 70 | IT235413 | landrace | Germany     | DEU |
| 71 | IT235966 | landrace | Kyrgyzstan  | KGZ |
| 72 | IT247931 | landrace | China       | CHN |
| 73 | IT247932 | Cultivar | China       | CHN |
| 74 | IT247938 | Cultivar | China       | CHN |
| 75 | IT247960 | landrace | China       | CHN |
| 76 | IT247966 | Cultivar | China       | CHN |
| 77 | IT247979 | Cultivar | China       | CHN |
| 78 | IT248400 | Cultivar | Japan       | JPN |
| 79 | IT248599 | landrace | South Korea | KOR |
| 80 | IT251123 | Cultivar | China       | CHN |
| 81 | IT260815 | Cultivar | China       | CHN |
| 82 | IT278620 | landrace | Myanmar     | MMR |
| 83 | IT278640 | landrace | South Korea | KOR |

|     |          |          |                |     |
|-----|----------|----------|----------------|-----|
| 84  | IT278703 | landrace | South Korea    | KOR |
| 85  | IT293003 | landrace | Mongolia       | MNG |
| 86  | IT293004 | landrace | Mongolia       | MNG |
| 87  | IT293076 | landrace | Austria        | AUT |
| 88  | IT321040 | landrace | South Korea    | KOR |
| 89  | IT321041 | landrace | South Korea    | KOR |
| 90  | IT327479 | Cultivar | China          | CHN |
| 91  | IT336315 | landrace | South Korea    | KOR |
| 92  | IT339601 | Cultivar | South Korea    | KOR |
| 93  | IT339602 | landrace | South Korea    | KOR |
| 94  | IT344732 | landrace | Malaysia       | MYS |
| 95  | IT344733 | landrace | Japan          | JPN |
| 96  | IT344734 | landrace | Japan          | JPN |
| 97  | IT344735 | landrace | Newzealand     | NZL |
| 98  | IT344736 | landrace | Austria        | AUT |
| 99  | IT344737 | landrace | Austria        | AUT |
| 100 | IT344740 | landrace | France         | FRA |
| 101 | IT344741 | landrace | Netherland     | NLD |
| 102 | IT344742 | landrace | United Kingdom | GBR |
| 103 | IT344743 | Cultivar | Russia         | RUS |
| 104 | IT344746 | Cultivar | China          | CHN |
| 105 | IT344747 | Cultivar | China          | CHN |
| 106 | IT344748 | Cultivar | China          | CHN |
| 107 | IT344749 | Cultivar | China          | CHN |
| 108 | IT344750 | Cultivar | China          | CHN |
| 109 | IT344751 | Cultivar | Russia         | RUS |
| 110 | IT344752 | landrace | China          | CHN |
| 111 | IT344755 | landrace | Japan          | JPN |
| 112 | IT344756 | landrace | China          | CHN |
| 113 | IT344757 | Cultivar | South Korea    | KOR |
| 114 | IT344758 | Cultivar | South Korea    | KOR |
| 115 | IT344759 | Cultivar | South Korea    | KOR |

|     |          |          |             |     |
|-----|----------|----------|-------------|-----|
| 116 | IT344760 | Cultivar | South Korea | KOR |
| 117 | IT344761 | Cultivar | South Korea | KOR |
| 118 | IT344763 | landrace | China       | CHN |
| 119 | IT344764 | Cultivar | South Korea | KOR |
| 120 | IT344765 | Cultivar | South Korea | KOR |
| 121 | IT344766 | Cultivar | South Korea | KOR |
| 122 | IT344767 | Cultivar | South Korea | KOR |
| 123 | IT344768 | Cultivar | South Korea | KOR |
| 124 | IT344770 | Cultivar | South Korea | KOR |
| 125 | IT344771 | landrace | China       | CHN |
| 126 | IT344772 | landrace | China       | CHN |
| 127 | IT344773 | landrace | China       | CHN |
| 128 | IT344774 | landrace | China       | CHN |
| 129 | IT344775 | landrace | Thailand    | THA |
| 130 | IT344776 | landrace | Thailand    | THA |
| 131 | IT344777 | landrace | Thailand    | THA |
| 132 | IT344778 | landrace | South Korea | KOR |
| 133 | IT344779 | landrace | South Korea | KOR |
| 134 | IT344780 | Landrace | South Korea | KOR |

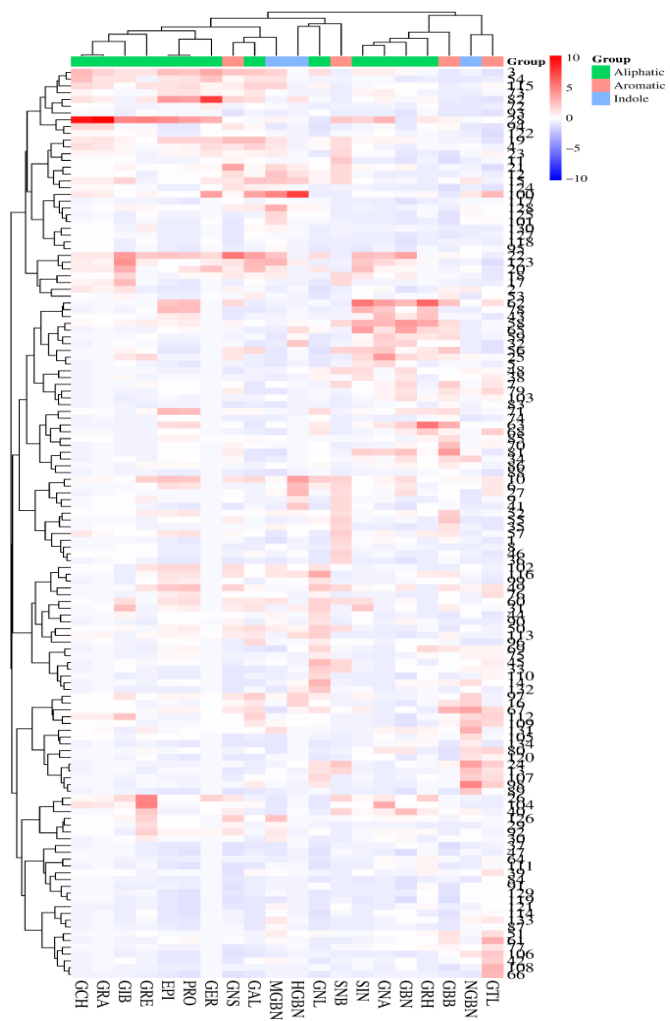

Figure S1. Heatmap hierarchical clustering showing glucosinolate compounds in 150 Chinese cabbage accessions. Color scale for hierarchical clustering is labeled. PRO: Progoitrin; EPI: Epiprogoitrin; GNL: Gluconapoleiferin; MGBS: 4-Methoxyglucobrassicin; GNS: Gluconasturtiin; GAL: Glucoalyssin; GRA: Glucoraphanin; GER: Glucoerucin; GBN: Glucobrassicinapin; GNA: Gluconapin; GCH: Glucocheirolin; SIN: Sinigrin; GTL: Glucotropaeolin; GRE: Glucoraphenin; GRH: Glucoraphasatin; GIB: Glucoiberin; SNB: Sinalbin; NGBS: Neoglucobrassicin; GBB: Glucobarbarin; HGBS: 4-Hydroxyglucobrassicin; TGSL: Total GSL
